# Supplementary material for: The Effect of Tethers on Artificial Cell Membranes: A Coarse-Grained Molecular Dynamics Study
Source: PubMed Central journal article supplement (PMC5063460; doi:10.1371/journal.pone.0162790), 2016-10-13
Supplement: pone.0162790.s002.pdf [file pone.0162790.s002.pdf]

| Symbol                        | Definition                   | Value                                     |                   |              |
|-------------------------------|------------------------------|-------------------------------------------|-------------------|--------------|
| $\gamma$                      | Edge energy                  | $1.2 \times 10^{-11}$ J/m                 |                   |              |
| $\sigma$                      | Surface tension              | $15 \times 10^{-3}$ J/m <sup>2</sup>      |                   |              |
| $\alpha$                      | Creation rate coefficient    | $1 \times 10^9$ s <sup>-1</sup>           |                   |              |
| $q$                           | $q = (r_m/r_*)^2$            | 2.46                                      |                   |              |
| $C$                           | Steric repulsion constant    | $9.67 \times 10^{-15}$ J <sup>1/4</sup> m |                   |              |
| $D$                           | Radial diffusion coefficient | $1 \times 10^{-14}$ m <sup>2</sup> /s     |                   |              |
| $r_m$                         | Equilibrium pore radius      | 0.8 nm                                    |                   |              |
| $G_p(r_m)$                    | Equilibrium pore conductance | 1.56 nS                                   |                   |              |
| $R_e$                         | Electrolyte resistance       | 100-800 $\Omega$                          |                   |              |
| <b>Spacer Surface:</b>        |                              |                                           |                   |              |
| $p$                           | Fractional order parameter   | 0.83                                      |                   |              |
| $C_{dl}$                      | Double-layer capacitance     | 230 nF                                    |                   |              |
| <b>DphPC Membrane</b>         |                              | <b>Tether Density:</b>                    |                   | <b>100%</b>  |
| $G_0$                         | Initial membrane conductance | 1.00 $\mu$ S                              | 0.66 $\mu$ S      | 0.33 $\mu$ S |
| $C_m$                         | Membrane capacitance         | 16.0-17.5 nF                              | 12.5-16.0 nF      | 12.4 nF      |
| $p$                           | Fractional order parameter   | 0.90-0.95                                 | 0.90-0.95         | 0.93         |
| $C_{dl}$                      | Double-layer capacitance     | 100-180 nF                                | 100-180 nF        | 120-180 nF   |
| $V_{ep}$                      | Voltage of electroporation   | 350-415 mV                                | 480-560 mV        | 650 mV       |
| $K_t$                         | Spring constant              | 0 N/m                                     | 0 N/m             | 20 mN/m      |
| <b>S. cerevisiae Membrane</b> |                              | <b>Tether Density:</b>                    |                   | <b>10%</b>   |
| $G_0$                         | Initial membrane conductance | 5.00 $\mu$ S                              | 1.11-1.66 $\mu$ S |              |
| $C_m$                         | Membrane capacitance         | 16.0-18.0 nF                              | 14.0 nF           |              |
| $p$                           | Fractional order parameter   | 0.90                                      | 0.90-0.92         |              |
| $C_{dl}$                      | Double-layer capacitance     | 180 nF                                    | 180 nF            |              |
| $V_{ep}$                      | Voltage of electroporation   | 330-350 mV                                | 410-430 mV        |              |
| $K_t$                         | Spring constant              | 0 N/m                                     | 0 N/m             |              |
| <b>E. coli Membrane</b>       |                              | <b>Tether Density:</b>                    |                   | <b>10%</b>   |
| $G_0$                         | Initial membrane conductance | 2.00-1.00 $\mu$ S                         | 0.66 $\mu$ S      |              |
| $C_m$                         | Membrane capacitance         | 14.0 nF                                   | 15.0-17.0 nF      |              |
| $p$                           | Fractional order parameter   | 0.90-0.91                                 | 0.90-0.91         |              |
| $C_{dl}$                      | Double-layer capacitance     | 180 nF                                    | 180 nF            |              |
| $V_{ep}$                      | Voltage of electroporation   | 360-380 mV                                | 400-450 mV        |              |
| $K_t$                         | Spring constant              | 0 N/m                                     | 0 N/m             |              |

**Table S1: Parameters for CED Current Predictions.** The parameters  $G_0$ ,  $C_m$ ,  $C_{dl}$ , and  $R_e$  in Table S1 are estimated using a single impedance measurement for each tethered membrane. The electroporation parameters  $C$ ,  $D$ ,  $r_m$  are obtained from 6, 74-78. The parameters  $\sigma$  and  $\gamma$  are computed from the CGMD simulations. Since  $\alpha$  and  $q$  are not dependent on the tether density, only a single current measurement was used to estimate these parameters, and found to be consistent with those reported in 75.
