# Supplementary material for: The Effect of Tethers on Artificial Cell Membranes: A Coarse-Grained Molecular Dynamics Study
Source: PubMed Central journal article supplement (PMC5063460; doi:10.1371/journal.pone.0162790), 2016-10-13

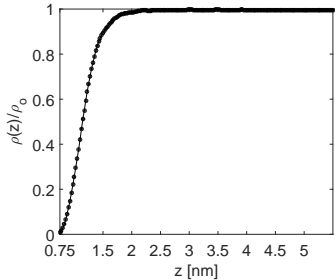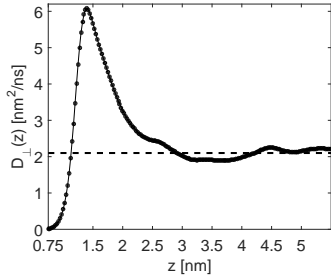

Supplement: pone.0162790.s005.pdf [file pone.0162790.s005.pdf]
